# Supplementary material for: Siplizumab Induces NK Cell Fratricide Through Antibody-Dependent Cell-Mediated Cytotoxicity
Source: PubMed Central journal article supplement (PMC7904868; doi:10.3389/fimmu.2021.599526), 2021-02-11
Supplement: DataSheet_1.pdf [file DataSheet_1.pdf]

## Supplementary information

**Supplementary table S1. Cell-based FcγRI signaling assay.** Mean normalized luminescence ± SD (N=3).

| [ANTIBODY]<br>in nM | Siplizumab |      | DG siplizumab |      | FcS anti-CD2 IgG1 |     | FcS anti-CD2 IgG2 |     | FcS anti-CD2 IgG4 |     |
|---------------------|------------|------|---------------|------|-------------------|-----|-------------------|-----|-------------------|-----|
| <b>6.67</b>         | 100.0      | 0.0  | 125.6         | 2.7  | 5.7               | 0.4 | 3.8               | 0.7 | 3.2               | 0.4 |
| <b>1.11</b>         | 103.1      | 6.0  | 123.0         | 11.0 | 5.8               | 0.9 | 3.5               | 0.5 | 3.0               | 0.4 |
| <b>0.19</b>         | 106.0      | 11.9 | 127.3         | 8.5  | 6.0               | 0.5 | 3.2               | 0.3 | 2.9               | 0.2 |
| <b>0.031</b>        | 101.7      | 13.6 | 107.8         | 6.9  | 3.4               | 0.4 | 2.9               | 0.7 | 2.8               | 0.2 |
| <b>0.0051</b>       | 26.7       | 3.9  | 41.9          | 2.6  | 2.5               | 0.3 | 2.6               | 0.1 | 2.6               | 0.5 |
| <b>0.00086</b>      | 5.1        | 0.4  | 8.5           | 1.2  | 2.5               | 0.3 | 2.5               | 0.5 | 2.9               | 0.4 |
| <b>0.000143</b>     | 2.4        | 0.7  | 2.5           | 0.4  | 2.4               | 0.6 | 2.4               | 0.4 | 2.6               | 0.5 |
| <b>0.000024</b>     | 2.4        | 0.5  | 2.6           | 0.6  | 2.7               | 0.4 | 2.4               | 0.3 | 2.8               | 0.5 |

**Supplementary table S2. Cell-based FcγRIIA signaling assay.** Mean normalized luminescence ± SD (N=3).

| [ANTIBODY]<br>in nM | Siplizumab |      | DG siplizumab |     | FcS anti-CD2 IgG1 |     | FcS anti-CD2 IgG2 |     | FcS anti-CD2 IgG4 |     |
|---------------------|------------|------|---------------|-----|-------------------|-----|-------------------|-----|-------------------|-----|
| <b>666.7</b>        | 100.0      | 0.0  |               |     |                   |     |                   |     |                   |     |
| <b>111.1</b>        | 107.8      | 17.5 |               |     |                   |     |                   |     |                   |     |
| <b>18.52</b>        | 70.1       | 3.7  |               |     |                   |     |                   |     |                   |     |
| <b>3.09</b>         | 45.3       | 1.2  |               |     |                   |     |                   |     |                   |     |
| <b>0.51</b>         | 40.7       | 4.0  |               |     |                   |     |                   |     |                   |     |
| <b>0.086</b>        | 11.0       | 1.4  |               |     |                   |     |                   |     |                   |     |
| <b>0.014</b>        | 3.2        | 0.6  |               |     |                   |     |                   |     |                   |     |
| <b>0.002</b>        | 3.0        | 0.3  |               |     |                   |     |                   |     |                   |     |
| <b>66.7</b>         |            |      | 4.4           | 0.9 | 3.1               | 0.6 | 6.6               | 2.0 | 3.8               | 0.9 |
| <b>11.1</b>         |            |      | 3.2           | 0.4 | 3.4               | 0.8 | 5.7               | 0.4 | 3.1               | 0.6 |
| <b>1.85</b>         |            |      | 3.2           | 0.4 | 3.1               | 0.7 | 4.4               | 0.4 | 3.7               | 1.4 |
| <b>0.31</b>         |            |      | 2.9           | 0.7 | 3.0               | 0.6 | 4.4               | 0.5 | 3.5               | 0.2 |
| <b>0.051</b>        |            |      | 3.4           | 0.6 | 2.8               | 0.6 | 3.6               | 0.4 | 3.3               | 1.2 |
| <b>0.009</b>        |            |      | 2.6           | 0.4 | 2.7               | 0.7 | 2.9               | 0.4 | 2.4               | 0.2 |
| <b>0.001</b>        |            |      | 3.0           | 0.4 | 3.0               | 1.1 | 3.2               | 0.1 | 2.3               | 0.5 |
| <b>0.00024</b>      |            |      | 2.6           | 0.4 | 2.5               | 0.5 | 3.0               | 0.5 | 3.4               | 0.4 |

**Supplementary table S3. Cell-based Fc $\gamma$ RIIIA signaling assay.** Mean normalized luminescence  $\pm$  SD (N=3).

| [ANTIBODY]<br>in nM | Siplizumab |      | DG siplizumab |     | FcS anti-CD2 IgG1 |     | FcS anti-CD2 IgG2 |     | FcS anti-CD2 IgG4 |     |
|---------------------|------------|------|---------------|-----|-------------------|-----|-------------------|-----|-------------------|-----|
| <b>6.67</b>         | 100.0      | 0.0  | 7.3           | 0.6 | 6.8               | 0.7 | 3.8               | 0.5 | 6.8               | 0.3 |
| <b>1.11</b>         | 100.0      | 13.8 | 8.4           | 1.9 | 7.0               | 0.2 | 3.2               | 0.1 | 7.3               | 1.1 |
| <b>0.19</b>         | 89.0       | 7.1  | 7.0           | 0.2 | 7.3               | 0.9 | 2.8               | 0.2 | 6.7               | 1.1 |
| <b>0.031</b>        | 74.8       | 4.4  | 6.5           | 0.9 | 6.4               | 0.8 | 4.1               | 0.4 | 6.2               | 0.4 |
| <b>0.0051</b>       | 44.5       | 3.9  | 6.5           | 0.7 | 6.3               | 0.5 | 5.4               | 0.2 | 6.4               | 0.9 |
| <b>0.00086</b>      | 13.4       | 3.0  | 6.0           | 0.9 | 6.8               | 1.4 | 6.2               | 0.3 | 6.3               | 0.1 |
| <b>0.000143</b>     | 6.6        | 0.9  | 7.5           | 2.0 | 6.7               | 0.5 | 6.5               | 0.6 | 6.1               | 1.4 |
| <b>0.000024</b>     | 6.1        | 0.4  | 5.9           | 1.0 | 6.6               | 1.5 | 6.1               | 0.5 | 6.4               | 0.5 |

**Supplementary table S4. CD2 expression.** Average CD2 median fluorescent intensity  $\pm$  SEM (N=5). ). Repeated-measure one-way ANOVA results followed by Dunnett's multiple comparison test (\* p<0.05, \*\* p<0.01).

|                                            | AVERAGE MFI | SEM   |
|--------------------------------------------|-------------|-------|
| <b>T CELLS</b>                             | 651.9       | 56.3  |
| <b>CD4 TN</b>                              | 442.6       | 7.6   |
| <b>CD4 TCM</b>                             | 644.7       | 48.9  |
| <b>CD4 TEM</b>                             | 791.8       | 102.4 |
| <b>CD4 TMERA</b>                           | 468.9       | 36.6  |
| <b>CD8 TN</b>                              | 655.7       | 28.3  |
| <b>CD8 TCM</b>                             | 852.5       | 147.9 |
| <b>CD8 TEM</b>                             | 1165.1      | 92.7  |
| <b>CD8 TEMRA</b>                           | 740.4       | 117.7 |
| <b>RTREG</b>                               | 442.1       | 43.2  |
| <b>NSTREG</b>                              | 621.1       | 38.7  |
| <b>ATREG</b>                               | 777.5       | 97.0  |
| <b>B CELLS</b>                             | 2.7**       | 21.2  |
| <b>CD56<sup>BRIGHT</sup></b>               | 713.3       | 120.6 |
| <b>CD56<sup>DIM</sup></b>                  | 150.5**     | 33.1  |
| <b>CD56<sup>NEG</sup> CD16<sup>+</sup></b> | 145.1*      | 46.0  |

**Supplementary table S5. CD2 expression on resting and activated PBMC.** Two-tailed paired t-test results (\* p<0.05, \*\* p<0.01). Data shown as average median fluorescence intensity  $\pm$  SEM.

|                 | T cells   |        | B cells |       | CD56 <sup>bright</sup> |        | CD56 <sup>dim</sup> |       | CD56 <sup>neg</sup> CD16 <sup>+</sup> |       |
|-----------------|-----------|--------|---------|-------|------------------------|--------|---------------------|-------|---------------------------------------|-------|
| <b>RESTING</b>  | 657.3     | 102.0  | 2.7     | 47.4  | 713.3                  | 269.6  | 150.5               | 74.0  | 145.1                                 | 102.8 |
| <b>ACTVATED</b> | 11226.6** | 3749.1 | 0.0     | 196.4 | 3465.0*                | 1674.6 | 990.8**             | 256.1 | 990.8**                               | 256.1 |

**Supplementary table S6. CD69+ NK cells in mixed lymphocyte reaction over time.** Mean percentage of CD69+ NK cells  $\pm$  SD (N=12). Repeated-measure two-way ANOVA results followed by Dunnett's multiple comparison test (\* p<0.05, \*\* p<0.01, \*\*\* p<0.001, \*\*\*\* p<0.0001).

| Time in days | No antibody |      | Siplizumab |      | DG siplizumab |      |
|--------------|-------------|------|------------|------|---------------|------|
| <b>0</b>     | 5.6         | 4.4  |            |      |               |      |
| <b>1</b>     | 14.2        | 7.9  | 43.2****   | 12.4 | 14.6          | 6.6  |
| <b>2</b>     | 15.5        | 6.4  | 32.7***    | 10.8 | 8.1***        | 4.3  |
| <b>4</b>     | 33.2        | 19.4 | 36.5       | 17.7 | 16.1**        | 12.3 |
| <b>7</b>     | 37.8        | 20.0 | 36.5       | 14.6 | 20.4**        | 12.7 |

**Supplementary table S7. CD69+ NK cells in autologous lymphocyte culture over time.** Mean percentage of CD69+ NK cells  $\pm$  SD (N=12). Repeated-measure two-way ANOVA results followed by Dunnett's multiple comparison test (\* p<0.05, \*\* p<0.01, \*\*\* p<0.001, \*\*\*\* p<0.0001).

| Time in days | No antibody |      | Siplizumab |      | DG siplizumab |     |
|--------------|-------------|------|------------|------|---------------|-----|
| <b>0</b>     | 5.7         | 4.4  |            |      |               |     |
| <b>1</b>     | 12.0        | 7.2  | 43.5****   | 17.7 | 15.1*         | 8.6 |
| <b>2</b>     | 6.3         | 3.8  | 34.5****   | 13.9 | 7.3           | 4.5 |
| <b>4</b>     | 9.6         | 7.7  | 24.4***    | 10.7 | 6.5**         | 6.3 |
| <b>7</b>     | 15.5        | 11.1 | 25.7**     | 8.2  | 13.1          | 8.2 |

**Supplementary table S8. CD69+ NK cells after seven days of mixed lymphocyte reaction incubated with increasing doses of anti-CD2 antibody.** Mean percentage of CD69+ NK cells  $\pm$  SD (N=9). Repeated-measure one-way ANOVA results followed by Dunnett's multiple comparison test (\* p<0.05, \*\* p<0.01, \*\*\* p<0.001).

| [Antibody] in $\mu$ g/ml | Siplizumab |      | DG siplizumab |      | FcS anti-CD2 IgG1 |      | FcS anti-CD2 IgG2 |      | FcS anti-CD2 IgG4 |      |
|--------------------------|------------|------|---------------|------|-------------------|------|-------------------|------|-------------------|------|
| <b>0</b>                 | 28.6       | 15.1 |               |      |                   |      |                   |      |                   |      |
| <b>0.0001</b>            | 29.6       | 15.8 | 31.3          | 14.3 | 34.9              | 16.3 | 33.1              | 14.8 | 31.3              | 15.9 |
| <b>0.001</b>             | 28.3       | 14.9 | 28.6          | 13.2 | 34.2              | 15.5 | 29.9              | 13.7 | 31.3              | 14.3 |
| <b>0.01</b>              | 41.0       | 23.1 | 23.2          | 10.9 | 27.2              | 14.3 | 29.4              | 13.7 | 28.4              | 14.6 |
| <b>0.1</b>               | 49.7***    | 17.7 | 23.2          | 11.3 | 19.8*             | 10.9 | 11.9*             | 4.2  | 19.9*             | 10.7 |
| <b>1</b>                 | 42.9**     | 18.5 | 18.1**        | 12.0 | 18.7*             | 8.1  | 8.7**             | 4.3  | 18.6*             | 9.9  |
| <b>10</b>                | 42.1*      | 19.7 | 14.4**        | 8.0  | 14.3***           | 8.7  | 8.1**             | 4.9  | 14.1**            | 9.5  |

**Supplementary table S9. CD2 expression on NK cells after seven days of mixed lymphocyte reaction incubated with increasing doses of anti-CD2 antibody.** Average median CD2 fluorescence intensity on NK cells  $\pm$  SD (N=9). Repeated-measure one-way ANOVA results followed by Dunnett's multiple comparison test (\* p<0.05, \*\* p<0.01, \*\*\* p<0.001, \*\*\*\* p<0.0001).

| [Antibody] in $\mu$ g/ml | Siplizumab | DG siplizumab | FcS anti-CD2 IgG1 | FcS anti-CD2 IgG2 | FcS anti-CD2 IgG4 |
|--------------------------|------------|---------------|-------------------|-------------------|-------------------|
| 0                        | 3091.0     | 1074.0        |                   |                   |                   |
| 0.0001                   | 2912.0     | 1193.5        | 2910.0*           | 1115.2            | 3190.3            |
| 0.001                    | 2783.6*    | 1043.3        | 3033.1            | 1242.4            | 3146.7            |
| 0.01                     | 1968.2**   | 1110.7        | 2393.1**          | 919.6             | 2378.8**          |
| 0.1                      | 159.8***   | 61.5          | 909.3***          | 405.0             | 1557.1***         |
| 1                        | 124.8***   | 51.6          | 856.3***          | 439.6             | 1404.9***         |
| 10                       | 156.2***   | 86.5          | 1073.4****        | 686.5             | 1466.1***         |

**Supplementary table S10. NK cell lysis after incubation of purified NK cells with increasing doses of anti-CD2 antibody.** Mean percentage of 7-AAD+ NK cells  $\pm$  SD (N=6). Repeated-measure one-way ANOVA results followed by Dunnett's multiple comparison test (\* p<0.05, \*\* p<0.01, \*\*\* p<0.001).

| [Antibody] in $\mu$ g/ml | Siplizumab | FcS anti-CD2 IgG1 | FcS anti-CD2 IgG2 | FcS anti-CD2 IgG4 |
|--------------------------|------------|-------------------|-------------------|-------------------|
| 0                        | 6.0        | 2.4               |                   |                   |
| 0.001                    | 7.1        | 2.5               | 6.7               | 2.4               |
| 0.01                     | 14.6**     | 3.5               | 6.6               | 2.4               |
| 0.1                      | 28.8**     | 6.7               | 6.6               | 2.5               |
| 1                        | 33.3***    | 6.4               | 6.7               | 2.6               |
| 10                       | 35.0***    | 6.3               | 6.6               | 2.7               |

**Supplementary table S11. Normalized NK cell count after incubation of purified NK cells with increasing doses of anti-CD2 antibody.** Mean normalized NK cell count  $\pm$  SD (N=6). Repeated-measure one-way ANOVA results followed by Dunnett's multiple comparison test (\* p<0.05, \*\* p<0.01, \*\*\* p<0.001, \*\*\*\* p<0.0001).

| [Antibody] in $\mu$ g/ml | Siplizumab | FcS anti-CD2 IgG1 | FcS anti-CD2 IgG2 | FcS anti-CD2 IgG4 |
|--------------------------|------------|-------------------|-------------------|-------------------|
| 0                        | 100.0      | 0.0               |                   |                   |
| 0.001                    | 103.1      | 3.0               | 105.7             | 6.1               |
| 0.01                     | 81.0*      | 11.3              | 105.3             | 7.3               |
| 0.1                      | 47.8***    | 10.6              | 102.0             | 15.1              |
| 1                        | 41.0****   | 8.4               | 105.5             | 10.9              |
| 10                       | 41.1****   | 8.2               | 107.4             | 8.2               |

**Supplementary table S12. Normalized CD56<sup>dim</sup> NK cell count after incubation of purified NK cells with increasing doses of anti-CD2 antibody.** Mean normalized CD56<sup>dim</sup> NK cell count  $\pm$  SD (N=6). Repeated-measure one-way ANOVA results followed by Dunnett's multiple comparison test (\* p<0.05, \*\* p<0.01, \*\*\* p<0.001, \*\*\*\* p<0.0001).

| [Antibody] in $\mu$ g/ml | Siplizumab | FcS anti-CD2 IgG1 | FcS anti-CD2 IgG2 | FcS anti-CD2 IgG4 |
|--------------------------|------------|-------------------|-------------------|-------------------|
| <b>0</b>                 | 100.0      | 0.0               |                   |                   |
| <b>0.001</b>             | 102.8      | 2.8               | 106.1             | 6.1               |
| <b>0.01</b>              | 81.5*      | 9.8               | 105.7             | 6.9               |
| <b>0.1</b>               | 50.7***    | 10.7              | 102.4             | 14.5              |
| <b>1</b>                 | 43.8****   | 8.6               | 106.3             | 10.3              |
| <b>10</b>                | 44.0****   | 8.4               | 107.2             | 8.1               |

**Supplementary table S13. Normalized CD56<sup>bright</sup> NK cell count after incubation of purified NK cells with increasing doses of anti-CD2 antibody.** Mean normalized CD56<sup>bright</sup> NK cell count  $\pm$  SD (N=6). Repeated-measure one-way ANOVA results followed by Dunnett's multiple comparison test (\* p<0.05, \*\* p<0.01, \*\*\* p<0.001, \*\*\*\* p<0.0001).

| [Antibody] in $\mu$ g/ml | Siplizumab | FcS anti-CD2 IgG1 | FcS anti-CD2 IgG2 | FcS anti-CD2 IgG4 |
|--------------------------|------------|-------------------|-------------------|-------------------|
| <b>0</b>                 | 100.0      | 0.0               |                   |                   |
| <b>0.001</b>             | 94.6       | 10.2              | 95.4              | 13.7              |
| <b>0.01</b>              | 42.0**     | 25.8              | 98.5              | 22.3              |
| <b>0.1</b>               | 10.2****   | 5.1               | 93.9              | 22.2              |
| <b>1</b>                 | 7.0****    | 2.3               | 96.1              | 27.8              |
| <b>10</b>                | 7.3****    | 3.3               | 108.9             | 12.6              |

**Supplementary table S14. CD107a expression on NK cells after incubation of purified NK cells with increasing doses of anti-CD2 antibody.** Mean percentage of CD107a+ NK cells  $\pm$  SD (N=6). Repeated-measure one-way ANOVA results followed by Dunnett's multiple comparison test (\* p<0.05, \*\* p<0.01, \*\*\* p<0.001).

| [Antibody] in $\mu$ g/ml | Siplizumab | FcS anti-CD2 IgG1 | FcS anti-CD2 IgG2 | FcS anti-CD2 IgG4 |
|--------------------------|------------|-------------------|-------------------|-------------------|
| <b>0</b>                 | 1.6        | 1.9               |                   |                   |
| <b>0.001</b>             | 2.0*       | 1.9               | 1.9               | 2.4               |
| <b>0.01</b>              | 4.3**      | 2.4               | 1.7               | 2.1               |
| <b>0.1</b>               | 10.9**     | 4.8               | 1.7               | 2.0               |
| <b>1</b>                 | 13.0**     | 4.9               | 1.6               | 1.7               |
| <b>10</b>                | 14.8***    | 4.4               | 1.5               | 1.7               |

**Supplementary table S15. CD16 expression on NK cells after incubation of purified NK cells with increasing doses of anti-CD2 antibody.** Average median CD16 fluorescence intensity on NK cells  $\pm$  SD (N=6). Repeated-measure one-way ANOVA results followed by Dunnett's multiple comparison test (\* p<0.05, \*\* p<0.01, \*\*\* p<0.001, \*\*\*\* p<0.0001).

| [Antibody] in $\mu$ g/ml | Siplizumab | FcS anti-CD2 IgG1 | FcS anti-CD2 IgG2 | FcS anti-CD2 IgG4 |
|--------------------------|------------|-------------------|-------------------|-------------------|
| <b>0</b>                 | 1673.8     | 546.3             |                   |                   |
| <b>0.001</b>             | 1577.5     | 594.2             | 1645.5            | 612.3             |
| <b>0.01</b>              | 553.7**    | 344.3             | 1671.2            | 636.6             |
| <b>0.1</b>               | 118.9**    | 105.5             | 1624.7            | 589.7             |
| <b>1</b>                 | 80.3**     | 52.6              | 1599.2            | 557.4             |
| <b>10</b>                | 69.3**     | 37.0              | 1677.5            | 594.5             |

**Supplementary table S16. CD107a expression on NK cells after incubation of purified NK cells with increasing doses of anti-CD2 antibody and SPI-801 target cells.** Mean percentage of CD107a+ NK cells  $\pm$  SD (N=6). Pre-incubation of NK cells with anti-CD2 mAbs for 30 minutes before target cell addition. Repeated-measure one-way ANOVA results followed by Dunnett's multiple comparison test (\* p<0.05, \*\* p<0.01, \*\*\* p<0.001).

| [Antibody] in $\mu$ g/ml | Siplizumab | FcS anti-CD2 IgG1 | FcS anti-CD2 IgG2 | FcS anti-CD2 IgG4 | NK only |
|--------------------------|------------|-------------------|-------------------|-------------------|---------|
| <b>0</b>                 | 14.7***    | 3.8               |                   |                   | 0.4***  |
| <b>0.001</b>             | 17.6       | 6.1               | 19.1              | 4.8               | 13.9    |
| <b>0.01</b>              | 23.3       | 7.9               | 18.6              | 5.8               | 13.0    |
| <b>0.1</b>               | 28.8*      | 8.0               | 16.0              | 5.5               | 13.1    |
| <b>1</b>                 | 37.9**     | 10.9              | 16.8              | 6.2               | 11.3    |
| <b>10</b>                | 43.5**     | 12.6              | 16.6              | 5.3               | 12.6    |

**Supplementary table S17. CD107a expression on NK cells after incubation of purified NK cells with increasing doses of anti-CD2 antibody and SPI-801 target cells.** Mean percentage of CD107a+ NK cells  $\pm$  SD (N=6). Pre-incubation of NK cells with anti-CD2 mAbs for 48 hours before target cell addition. Repeated-measure one-way ANOVA results followed by Dunnett's multiple comparison test (\* p<0.05, \*\* p<0.01, \*\*\* p<0.001).

| [Antibody] in $\mu$ g/ml | Siplizumab | FcS anti-CD2 IgG1 | FcS anti-CD2 IgG2 | FcS anti-CD2 IgG4 | NK only |
|--------------------------|------------|-------------------|-------------------|-------------------|---------|
| <b>0</b>                 | 31.6       | 9.3               |                   |                   | 1.5**   |
| <b>0.001</b>             | 27.0       | 4.4               | 30.7              | 7.4               | 29.3    |
| <b>0.01</b>              | 28.8       | 6.9               | 31.8              | 7.5               | 29.1    |
| <b>0.1</b>               | 31.9       | 9.6               | 31.0              | 8.5               | 26.9    |
| <b>1</b>                 | 31.8       | 7.5               | 28.7              | 6.1               | 26.5    |
| <b>10</b>                | 31.9       | 9.4               | 28.3              | 4.8               | 28.9    |

**Supplementary table S18. CD107a expression on NK cells after incubation of purified NK cells with increasing doses of Rituximab and CD20<sup>+</sup> target cells.** Mean percentage of CD107a<sup>+</sup> NK cells  $\pm$  SD (N=6). Repeated-measure one-way ANOVA results followed by Dunnett's multiple comparison test (\*<sup>(\*)</sup> p<0.1, \* p<0.05, \*\* p<0.01, \*\*\* p<0.001).

| [Rituximab] in $\mu$ g/ml | No anti-CD2         |      | Siplizumab         | FcS anti-CD2 IgG1 |       | FcS anti-CD2 IgG2 |                     | FcS anti-CD2 IgG4 |                     |     |
|---------------------------|---------------------|------|--------------------|-------------------|-------|-------------------|---------------------|-------------------|---------------------|-----|
| <b>0</b>                  | 2.2                 | 2.5  |                    |                   |       |                   |                     |                   |                     |     |
| <b>0.0001</b>             | 2.4                 | 2.4  | 5.1 <sup>(*)</sup> | 4.3               | 2.2   | 2.1               | 1.7                 | 1.7               | 2.3                 | 2.7 |
| <b>0.001</b>              | 2.7                 | 2.0  | 5.3*               | 4.3               | 2.6   | 2.2               | 1.9                 | 1.8               | 2.6                 | 2.2 |
| <b>0.01</b>               | 5.8 <sup>(*)</sup>  | 2.8  | 5.4*               | 4.3               | 5.5*  | 3.0               | 4.7                 | 3.0               | 5.3                 | 3.4 |
| <b>0.1</b>                | 13.7*               | 7.1  | 7.0*               | 4.2               | 13.4* | 7.0               | 12.8 <sup>(*)</sup> | 8.0               | 13.3 <sup>(*)</sup> | 8.8 |
| <b>1</b>                  | 18.8 <sup>(*)</sup> | 10.9 | 8.7**              | 3.7               | 17.9* | 9.8               | 15.4*               | 8.5               | 15.7*               | 8.4 |

**Supplementary table S19. Normalized target cell count after incubation of purified NK cells with increasing doses of Rituximab and CD20<sup>+</sup> target cells.** Mean normalized target cell count  $\pm$  SD (N=6). Repeated-measure one-way ANOVA results followed by Dunnett's multiple comparison test (\*<sup>(\*)</sup> p<0.1, \* p<0.05, \*\* p<0.01, \*\*\* p<0.001, \*\*\*\* p<0.0001).

| [Rituximab] in $\mu$ g/ml | No anti-CD2 |      | Siplizumab | FcS anti-CD2 IgG1 |          | FcS anti-CD2 IgG2 |                     | FcS anti-CD2 IgG4 |          |      |
|---------------------------|-------------|------|------------|-------------------|----------|-------------------|---------------------|-------------------|----------|------|
| <b>0</b>                  | 100         | 0    |            |                   |          |                   |                     |                   |          |      |
| <b>0.0001</b>             | 91.9        | 16.2 | 155.3      | 49.8              | 113.9    | 16.7              | 137.1               | 30.8              | 106.0    | 21.1 |
| <b>0.001</b>              | 82.4        | 22.8 | 145.3      | 47.9              | 99.0     | 31.4              | 114.9               | 32.1              | 85.5     | 26.5 |
| <b>0.01</b>               | 47.5**      | 15.2 | 132.9      | 35.9              | 53.2*    | 21.6              | 67.0 <sup>(*)</sup> | 24.6              | 59.9*    | 24.0 |
| <b>0.1</b>                | 29.6****    | 10.3 | 94.7       | 20.7              | 29.0***  | 13.3              | 28.2****            | 9.5               | 30.3***  | 13.1 |
| <b>1</b>                  | 21.0****    | 8.0  | 64.1*      | 22.1              | 22.1**** | 10.6              | 22.8****            | 8.4               | 26.0**** | 10.8 |

**Supplementary table S20. CD2 expression on NK cells after incubation of purified NK cells with increasing doses of Rituximab and CD20<sup>+</sup> target cells.** Median CD2 fluorescence intensity on NK cells  $\pm$  SEM (N=6). Repeated-measure one-way ANOVA results followed by Dunnett's multiple comparison test (\* p<0.05, \*\* p<0.01, \*\*\* p<0.001).

| [Rituximab] in $\mu$ g/ml | No anti-CD2 |        | Siplizumab | FcS anti-CD2 IgG1 |          | FcS anti-CD2 IgG2 |         | FcS anti-CD2 IgG4 |          |       |
|---------------------------|-------------|--------|------------|-------------------|----------|-------------------|---------|-------------------|----------|-------|
| <b>0</b>                  | 3299.7      | 1105.6 |            |                   |          |                   |         |                   |          |       |
| <b>0.0001</b>             | 3346.0      | 1118.4 | 1050.0**   | 603.1             | 2469.3** | 816.0             | 679.2** | 175.8             | 1136.7** | 369.9 |
| <b>0.001</b>              | 3452.2      | 1118.3 | 1082.0**   | 602.4             | 2610.5*  | 819.7             | 706.5** | 169.7             | 1249.7** | 397.0 |
| <b>0.01</b>               | 3780.0*     | 1204.6 | 1098.8**   | 614.6             | 3037.2   | 966.1             | 792.5** | 206.8             | 1632.5** | 618.7 |
| <b>0.1</b>                | 4155.3*     | 1440.2 | 1206.5**   | 690.8             | 3647.2   | 1153.5            | 898.2** | 258.2             | 2369.7*  | 776.7 |
| <b>1</b>                  | 4303.0*     | 1473.3 | 1287.3**   | 743.2             | 3898.5*  | 1212.8            | 889.3** | 267.4             | 2660.2*  | 841.5 |
